# Supplementary material for: Factors associated with false negative interferon-γ release assay results in patients with tuberculosis: A systematic review with meta-analysis
Source: PubMed Central journal article supplement (PMC6994686; doi:10.1038/s41598-020-58459-9), 2020-01-31
Supplement: 41598_2020_58459_MOESM1_ESM.pdf [file 41598_2020_58459_MOESM1_ESM.pdf]

**Factors associated with false negative interferon- $\gamma$  release assay results in patients with tuberculosis: A systematic review with meta-analysis**

Mari Yamasue\* 1), Kosaku Komiya\* 1), Yuko Usagawa 1), Kenji Umeki 1), Shin-ichi Nureki 1), Masaru Ando 1), Kazufumi Hiramatsu 1), Hideaki Nagai 2), Jun-ichi Kadota 1)

1) Department of Respiratory Medicine and Infectious Diseases, Oita University Faculty of Medicine, 1-1 Idaigaoka, Hasama-machi, Yufu, Oita 879-5593, Japan.

2) Center for Pulmonary Diseases, National Hospital Organization Tokyo National Hospital, 3-1-1 Takeoka, Kiyose, Tokyo 204-8585, Japan.

**Supplementary Table S1. Studies evaluating male gender as a risk factor for false-negative IGRA results**

| author<br>year | rate of male<br>(%)     | false-negative (n/N, %) |        | univariate analysis |             |       | multivariate analysis |             |       |
|----------------|-------------------------|-------------------------|--------|---------------------|-------------|-------|-----------------------|-------------|-------|
|                |                         | male                    | female | odds ratio          | 95% CI      | p     | odds ratio            | 95% CI      | p     |
| Aabye<br>2012  | 109/172 (63.3)<br>in TZ | nd                      | nd     | nd                  | nd          | nd    | QFT-GIT 0.99          | 0.34-2.90   | 0.99  |
| Komiya<br>2010 | 156/215 (73)*           | nd                      | nd     | 0.751               | 0.371-1.523 | 0.428 | QFT-G 0.562           | 0.234-1.351 | 0.198 |
| Raby<br>2008   | 72/112 (63)             | nd                      | nd     | 1.054               | 0.359-3.096 | 0.924 | ELISPOT 0.782         | 0.215-2.848 | 0.709 |
|                |                         |                         |        | 1.69                | 0.67-3.78   | 0.268 | QFT-GIT 1.1           | 0.29-3.07   | 0.861 |

nd, not described; TZ; Tanzania, \* both IGRAs were evaluated collectively and results from each of IGRA were not described

**Supplementary Table S2. Studies evaluating advanced age as a risk factor for false-negative IGRA results**

| author<br>year | cutoff<br>value<br>of age<br>(years) | rate of<br>advanced<br>age (%) | false-negative<br>(n/N, %) |                         | univariate analysis |                            |                  | multivariate analysis         |                            |                 |
|----------------|--------------------------------------|--------------------------------|----------------------------|-------------------------|---------------------|----------------------------|------------------|-------------------------------|----------------------------|-----------------|
|                |                                      |                                | advanced<br>age            | non-<br>advanced<br>age | odds<br>ratio       | 95% CI                     | p                | odds ratio                    | 95% CI                     | p               |
| Yang<br>2018   | older<br>age                         | nd                             | nd                         | nd                      | 1.017               | 1.012-1.022                | < 0.001          | T-SPOT 1.018                  | 1.013-1.024                | < 0.001         |
| Nugyen<br>2018 | >60                                  | 402/1487<br>(27.0)*            | 76/402<br>(18.9)*          | 107/1085<br>(9.9)*      | 2.13*               | 1.55-2.93*                 | < 0.001*         | QFT-GIT 1.02<br>T-SPOT 1.02   | 1.01-1.04<br>1.00-1.03     | < 0.001<br>0.01 |
| Di<br>2018     | <30                                  | 21/96<br>(21.8)                | nd                         | nd                      | 0.188               | 0.023-1.505                | 0.115            | T-SPOT 0.29                   | 0.035-2.41                 | 0.252           |
|                | 30-60                                | 47/96<br>(49.0)                | nd                         | nd                      | 1.66                | 0.575-4.798                | 0.349            |                               |                            |                 |
|                | >60                                  | 28/96<br>(29.2)                | 6/28<br>(21.4)             | 11/68<br>(16.2)         | 1.438               | 0.474-4.36                 | 0.521            |                               |                            |                 |
| Lian<br>2017   | older<br>age                         | nd                             | nd                         | nd                      | 0.983               | 0.971-0.995                | 0.006            | T-SPOT 0.985                  | 0.972-0.997                | 0.015           |
| Kwon<br>2015   | >65                                  | 386/1224<br>(31.3)             | 68/386<br>(17.6)           | 74/838<br>(8.8)         | 2.21                | 1.55-3.15                  | < 0.001          | QFT-GIT 1.6                   | 1.05-2.43                  | 0.029           |
| Choi<br>2015   | >65                                  | 69/300<br>(23)                 | 27/69<br>(39.1)            | 62/231<br>(26.8)        | 1.81                | 1.03-3.18                  | 0.04             | QFT-GIT 1.86                  | 0.98-3.52                  | 0.06            |
| Visser<br>2015 | older<br>age                         | nd                             | nd                         | nd                      | 1.02<br>1.02        | 1.01-1.03<br>0.99-1.05     | < 0.0001<br>0.06 | QFT-GIT 1.04                  | 1.02-1.07                  | < 0.001         |
| Pan<br>2014    | PTB<br>>48.5<br>EPTB<br>>39          | 265/530<br>(50)                | 30/265<br>(11.3)           | 16/265<br>(6.0)         | nd                  | nd                         | nd               | T-SPOT 2.26                   | 1.11-4.58                  | 0.031           |
|                |                                      | 123/244<br>(50.4)              | 22/123<br>(17.9)           | 10/121<br>(8.3)         | nd                  | nd                         | nd               | T-SPOT 2.42                   | 1.09-5.35                  | 0.026           |
| Joen<br>2013   | >40s                                 | nd                             | nd                         | nd                      | nd                  | nd                         | nd               | QFT-GIT 1.03                  | 1.005-1.056                | 0.02            |
| Aabye<br>2012  | older<br>age?                        | nd in TZ                       | nd                         | nd                      | nd                  | nd                         | nd               | QFT-GIT 0.99                  | 0.95-1.03                  | 0.60            |
| Hang<br>2011   | older<br>age                         | nd                             | nd                         | nd                      | 1.04                | 1.01-1.06                  | < 0.05           | QFT-GIT 1.04                  | 1.01-1.07                  | < 0.05          |
| Kim<br>2011    | older<br>age                         | nd                             | nd                         | nd                      | nd                  | nd                         | nd               | QFT-GIT 1.00                  | 0.98-1.02                  | 0.91            |
| Komiya<br>2010 | >67                                  | nd                             | nd                         | nd                      | 0.591<br>0.612      | 0.320-1.090<br>0.228-1.641 | 0.092<br>0.329   | QFT-G 1.18<br>ELISPOT<br>1.76 | 0.511-2.721<br>0.447-6.934 | 0.699<br>0.478  |
| Raby<br>2008   | >31                                  | nd                             | nd                         | nd                      | 1.20                | 0.51-2.81                  | 0.672            | QFT-GIT 1.13                  | 0.41-3.10                  | 0.810           |

PTB, pulmonary TB; EPTB, extrapulmonary TB; nd, not described; ?, cutoff value or definition were not shown; TZ, Tanzania

\* both IGRAs were evaluated collectively and results from each of IGRA were not described

**Supplementary Table S3. Studies evaluating low peripheral lymphocyte count as a risk factor for false-negative**

**IGRA results**

| author year                          | cutoff value of lymphocyte count (/μl) | rate of low lymphocyte count (%) | false-negative (n/N, %) |                    | univariate analysis |              |          | multivariate analysis |             |          |
|--------------------------------------|----------------------------------------|----------------------------------|-------------------------|--------------------|---------------------|--------------|----------|-----------------------|-------------|----------|
|                                      |                                        |                                  | low lymphocyte          | non-low lymphocyte | odds ratio          | 95% CI       | p        | odds ratio            | 95% CI      | p        |
| <i>total peripheral lymphocytes</i>  |                                        |                                  |                         |                    |                     |              |          |                       |             |          |
| Kwon 2015                            | < 1000                                 | 274/1,138 (24.1)                 | 48/274 (17.5)           | 86/864 (10.0)      | 1.93                | 1.32-2.83    | 0.001    | QFT-GIT 1.91          | 1.24-2.95   | 0.003    |
| Joen 2013                            | low lymphocyte                         | nd                               | nd                      | nd                 | nd                  | nd           | nd       | QFT-GIT 0.998         | 0.998-1.0   | 0.046    |
| Kim 2013                             | < 500                                  | 13/44 (30)                       | 8/13 (61.5)             | 6/31 (19.4)        | 6.667               | 1.597-27.833 | 0.009    | QFT-GIT 6.017         | 1.128-32.11 | 0.036    |
| Kim 2011                             | low lymphocyte                         | nd                               | nd                      | nd                 | nd                  | nd           | nd       | QFT-GIT 1.00          | 1.00-1.00   | 0.83     |
| Komiya 2010                          | < 1000                                 | 89/215 (41.4)                    | 34/89 (38.2)            | 15/126 (11.9)      | 5.167               | 2.679-9.967  | < 0.0001 | QFT-G 3.778           | 1.168-7.708 | < 0.0001 |
|                                      |                                        |                                  | 11/89 (12.4)            | 5/126 (4.0)        | 4.133               | 1.418-12.045 | 0.009    | ELISPOT 3.314         | 1.110-9.990 | 0.033    |
| <i>CD4<sup>+</sup> T lymphocytes</i> |                                        |                                  |                         |                    |                     |              |          |                       |             |          |
| Yang 2018                            | low lymphocyte?                        | nd                               | nd                      | nd                 | 1.789               | 1.121-2.856  | 0.015    | T-SPOT 0.423          | 0.077-2.326 | ns       |
| Raby 2008                            | < 200                                  | 24/96 (25)                       | 7/24 (29.2)             | 6/68 (8.8)         | 4.71                | 1.87-11.83   | 0.001    | QFT-GIT 4.68          | 1.74-12.6   | 0.002    |

nd, not described; ?, cutoff value or definition were not shown; ns, not significant

**Supplementary Table S4. Studies evaluating HIV positivity as a risk factor for false-negative IGRA results**

| author<br>year | HIV positivity<br>rate (%) | false-negative<br>(n/N, %) |                     | univariate analysis |            |        | multivariate analysis  |            |         |
|----------------|----------------------------|----------------------------|---------------------|---------------------|------------|--------|------------------------|------------|---------|
|                |                            | HIV<br>positive            | HIV<br>negative     | odds<br>ratio       | 95% CI     | p      | odds ratio             | 95% CI     | p       |
| Nugyen<br>2018 | 90/1,487 (6.1)*            | 20/90<br>(22.2)            | 163/1,397<br>(11.7) | 2.23*               | 1.32-3.78* | 0.003* | QFT-GIT<br>3.59        | 1.6-4.76   | < 0.001 |
|                |                            |                            |                     |                     |            |        | T-SPOT<br>1.34         | 0.44-4.07  | 0.6     |
| Choi<br>2015   | 18/300 (6)                 | 9/18<br>(50)               | 9/282<br>(3.2)      | 2.50                | 0.95-6.57  | 0.06   | QFT-<br>GIT/2G<br>2.79 | 1.02-7.61  | 0.04    |
| Aabye<br>2012  | 75/172 (43.6)<br>in TZ     | nd                         | nd                  | nd                  | nd         | nd     | QFT-GIT<br>2.11        | 0.73-6.14  | 0.17    |
| Hang<br>2011   | 32/489 (6.5)               | 5/32<br>(15.6)             | 19/457<br>(4.2)     | 4.26                | 1.48-12.28 | < 0.05 | QFT-GIT<br>4.26        | 1.48-12.28 | < 0.05  |

nd, not described; TZ, Tanzania

\* both IGRAs were evaluated collectively and results from each IGRA were not described

**Supplementary Table S5. Studies evaluating extrapulmonary tuberculosis as a risk factor for false-negative IGRA results**

| author<br>year | infection<br>site of TB | rate of<br>EPTB (%) | false-negative<br>(n/N, %) |                    | univariate analysis |               |           | multivariate analysis |                  |       |
|----------------|-------------------------|---------------------|----------------------------|--------------------|---------------------|---------------|-----------|-----------------------|------------------|-------|
|                |                         |                     | EPTB                       | without<br>EPTB    | odds<br>ratio       | 95% CI        | p         | odds ratio            | 95% CI           | p     |
| Kim<br>2018    | CNS TB                  | 26/163<br>(15.9)    | 15/26<br>(58.3)            | 32/137<br>(23.4)   | 4.38                | 1.83-10.51    | 0.001     | QFT-GIT<br>1.16       | 0.19-1.31        | 0.16  |
|                | GI TB                   | 58/163<br>(35.5)    | 7/58<br>(12.1)             | 40/105<br>(38.1)   | 0.31                | 0.12-0.75     | 0.01      | QFT-GIT<br>0.5        | 0.32-4.19        | 0.82  |
| Di<br>2018     | CNS TB                  | 8/98 (8.2)          | 6/8<br>(75)                | 11/90<br>(12.2)    | 21.273              | 3.808-118.834 | <<br>0.01 | T-SPOT<br>17.4        | 3.068-<br>98.671 | 0.001 |
| Lian<br>2017   | bone/joint<br>TB        | 22/556<br>(4.0)     | 10/22<br>(45.4)            | 67/534<br>(12.5)   | 0.241               | 0.096-0.602   | 0.002     | T-SPOT<br>0.321       | 0.125-0.823      | 0.018 |
|                | pleura TB               | 251/556<br>(45.1)   | 23/251<br>(9.2)            | 54/305<br>(17.7)   | 2.252               | 1.331-3.811   | 0.002     | T-SPOT<br>1.954       | 1.139-3.351      | 0.015 |
| Lee<br>2013    | CNS TB                  | 36/128<br>(28.1)    | 10/36<br>(27.8)            | 12/92<br>(13.0)    | 2.56                | 0.99-6.62     | 0.05      | T-SPOT<br>2.56        | 0.99-6.62        | 0.05  |
|                | skeletal<br>TB          | 23/128<br>(18.0)    | 0/23                       | 22/105<br>(21.0)   | 0.17                | 0.02-1.35     | 0.09      | T-SPOT<br>0.03        | 0.03-1.85        | 0.17  |
| Yang<br>2018   | without<br>EPTB         | 1840/2425<br>(75.9) | 130/585<br>(22.2)          | 475/1840<br>(25.8) | 1.218               | 0.976-1.519   | 0.081     | T-SPOT<br>1.291       | 1.026-1.623      | 0.029 |

EPTB, extrapulmonary TB; CNS, central nervous system (including meningitis); GI, gastrointestinal; nd, not described

**Supplementary Table S6. Studies evaluating body mass index as a risk factor for false-negative IGRA results**

| author<br>year | cutoff<br>value<br>of BMI<br>(kg/m <sup>2</sup> ) | rate of BMI<br>out of cutoff<br>value (%) | false-negative (n/N, %) |                 | univariate analysis |            |        | multivariate analysis |            |        |
|----------------|---------------------------------------------------|-------------------------------------------|-------------------------|-----------------|---------------------|------------|--------|-----------------------|------------|--------|
|                |                                                   |                                           | low BMI                 | not low<br>BMI  | odds<br>ratio       | 95% CI     | p      | odds ratio            | 95% CI     | p      |
| Pan<br>2014    | > 25                                              | 49/530 (9.2)                              | 37/481<br>(7.7)         | 9/49<br>(18.3)  | nd                  | nd         | nd     | T-SPOT<br>2.43        | 1.05-5.63  | < 0.05 |
| Hang<br>2011   | < 16                                              | 74/489 (15.1)                             | 9/74<br>(12.2)          | 15/415<br>(3.6) | 7.27                | 2.17-24.38 | < 0.05 | QFT-GIT<br>5.42       | 1.48-19.79 | < 0.05 |
| Raby<br>2008   | < 18.5                                            | nd                                        | nd                      | nd              | 1.29                | 0.53-3.18  | 0.574  | QFT-GIT<br>1.59       | 0.58-4.38  | 0.368  |

BMI, body mass index; nd, not described

**Supplementary Table S7. Other significant risk factors for false-negative IGRA results reported in a single study**

| risk factor                                                | cutoff value or definition of risk factor | false-negative (n/N, %) |                     | multivariate analysis |             |        |
|------------------------------------------------------------|-------------------------------------------|-------------------------|---------------------|-----------------------|-------------|--------|
|                                                            |                                           | with risk factor        | without risk factor | odds ratio            | 95% CI      | p      |
| <i>smoking</i>                                             | smoking                                   |                         |                     |                       |             |        |
| Aabye 2012                                                 | 19/31 (61.2) in DK                        | 9/19 (47.3)             | 0/12                | QFT-GIT 11.3          | 1.2-287.7   | 0.02   |
|                                                            | 17/145 (11.7) in TZ                       | 6/17 (35.3)             | 16/112 (14.3)       | QFT-GIT 3.8           | 1.2-11.8    | 0.02   |
| <i>a longer duration of illness before hospitalization</i> |                                           |                         | >6 months           |                       |             |        |
| Pan 2014                                                   | 122/ 530 (23)                             | 18/122 (14.7)           | 28/408 (6.8)        | T-SPOT 2.46           | 1.24-4.92   | < 0.05 |
| <i>immunosuppressive conditions*</i>                       |                                           |                         |                     |                       |             |        |
| Kim 2011                                                   | 47/362 (13)                               | 16/3 (34.0)             | 35/315 (11.1)       | QFT-GIT 2.98          | 1.38-6.47   | 0.006  |
| <i>immunosuppressive therapy</i>                           |                                           |                         |                     |                       |             |        |
| Komiya 2010                                                | 18/215 (8.3)                              | 5/18 (27.8)             | 11/197 (5.6)        | ELISPOT 0.202         | 0.060-0.684 | 0.01   |
| <i>malignancy</i>                                          |                                           |                         |                     |                       |             |        |
| Kwon 2015                                                  | 83/1,224 (6.8)                            | 12/83 (14.5)            | 130/1141 (11.4)     | QFT-GIT 2.5           | 1.33-4.60   | 0.004  |
| <i>high CRP</i>                                            | cutoff value was not described            |                         |                     |                       |             |        |
| Joen 2013                                                  | nd                                        | nd                      | nd                  | QFT-GIT 1.069         | 1.013-1.217 | 0.014  |
| <i>low serum albumin</i>                                   | < 3.3 g/dL                                |                         |                     |                       |             |        |
| Komiya 2010                                                | nd                                        | nd                      | nd                  | QFT-G 2.507           | 1.200-5.234 | 0.013  |
| <i>HLA type</i>                                            | DRB1*0701 alleles                         |                         |                     |                       |             |        |
| Hang 2011                                                  | 61/1,008 (6.1)                            | 11/61 (18.0)            | 37/947 (39.1)       | QFT-GIT 5.09          | 2.31-11.22  | < 0.05 |

DK: Demark, TZ: Tnzania, nd: not described

\*Immunosuppressive conditions: 1) solid cancer patients undergoing anticancer chemotherapy or radiotherapy, 2) patients with malignant hematological diseases, 3) organ or bone marrow transplant recipients; 4) patients with end-stage renal disease receiving renal replacement therapy, 5) patients with advanced (Child-Pugh class C) liver cirrhosis, and 6) patients receiving immunosuppressive drug treatment (15 mg/d prednisone or a combination of low-dose corticosteroids and azathioprine, mycophenolate, methotrexate, cyclosporine, or cyclophosphamide).



# Supplementary figure S1.

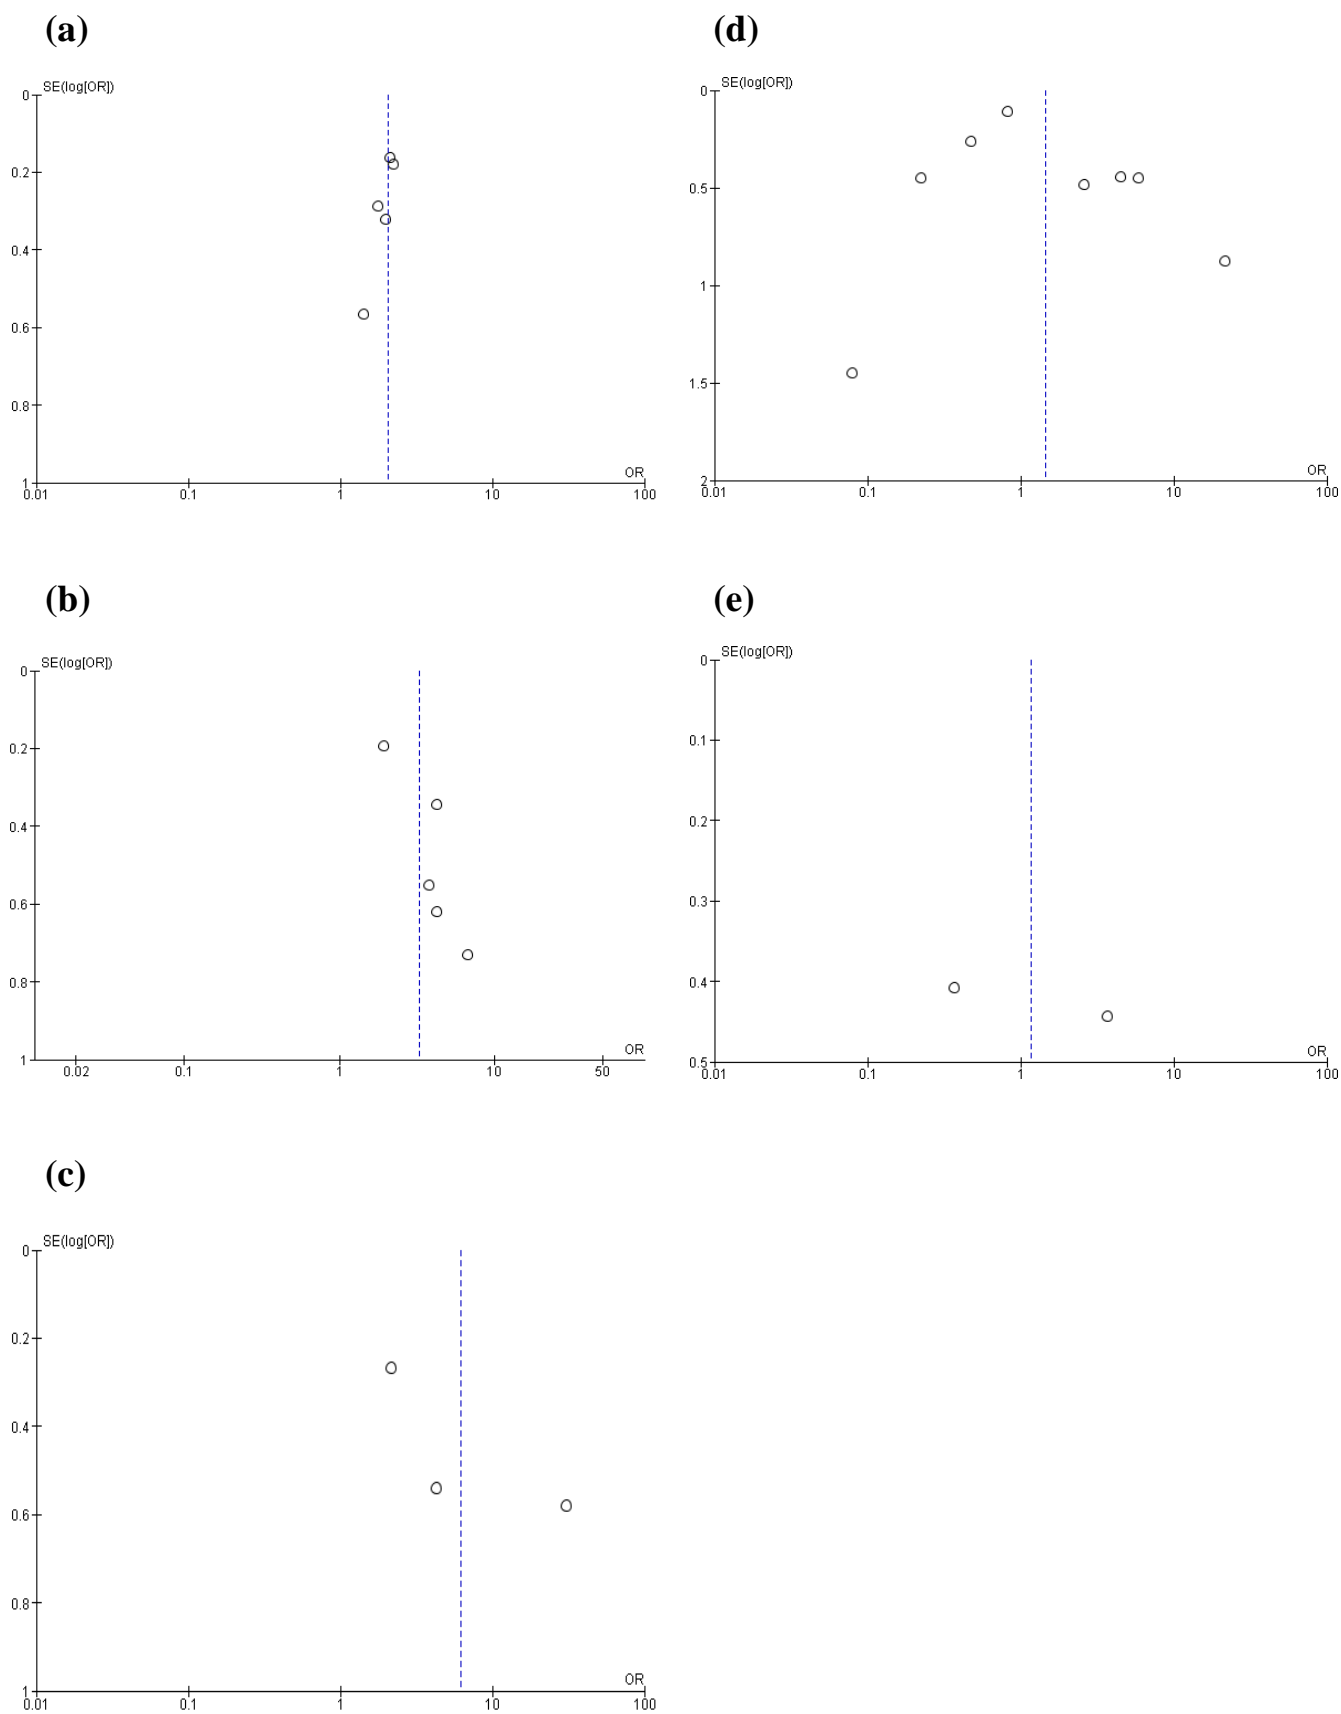

**Supplementary figure S1.** Funnel plot of studies evaluated advanced age (a), peripheral lymphocyte counts (b), HIV positivity (c), extrapulmonary TB (d) or BMI (e) as a risk factor for false negative results of IGRA.
